# Supplementary material for: Thioamination of Alkenes with Hypervalent Iodine Reagents
Source: PubMed Central journal article supplement (PMC4725223; doi:10.1002/chem.201504636), 2016-01-07
Supplement: chem0022-1614-sd1.pdf [file chem0022-1614-sd1.pdf]

# CHEMISTRY

## A **European** Journal

### Supporting Information

#### **Thioamination of Alkenes with Hypervalent Iodine Reagents**

Pushpak Mizar,<sup>[a]</sup> Rebecca Niebuhr,<sup>[a]</sup> Matthew Hutchings,<sup>[a]</sup> Umar Farooq,<sup>[a, b]</sup> and Thomas Wirth<sup>\*[a]</sup>

chem\_201504636\_sm\_miscellaneous\_information.pdf

## Supporting Information:

Materials and Methods: All reactions were carried out under a nitrogen atmosphere in oven dried glassware with magnetic stirring using usual Schlenk technique. THF, toluene, diethyl ether and  $\text{CH}_2\text{Cl}_2$  were purified and dried using standard methods. Triethylamine and diethylamine were distilled from sodium hydroxide. Reagents were purified prior to use unless otherwise stated. Purification of reaction products was carried out by flash chromatography using Fisher silica gel (35-70 mesh). NMR spectra were recorded on Bruker DPX 250, Bruker DPX 400, Bruker DPX 500, Bruker DPX 600, or Oxford 300.  $^1\text{H}$  NMR spectra were measured at 250, 300, 400 and 500 MHz.  $^{13}\text{C}$  NMR spectra were measured at 63, 100, 126 and 150 MHz using  $\text{CDCl}_3$ , or  $\text{DMSO-d}_6$  as a solvent and internal reference. Coupling constants  $J$  are given in Hz. Multiplicity as follows: s = singlet, d = doublet, t = triplet, q = quartet, m = multiplet, br = broad signal. Mass spectrometric data were obtained on a Varian 1200 Quadrupole Mass Spectrometer and Micromass Quadro II Spectrometer.

Typical procedure for the synthesis of 2-allylanilines <sup>[1]</sup>

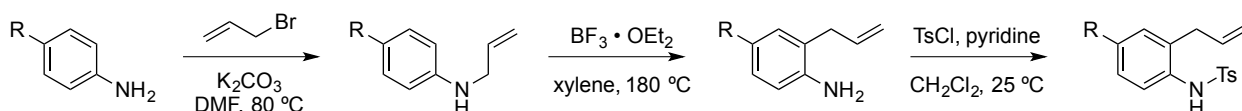

Allylbromide (1.40 mL, 16.24 mmol) was added dropwise to a solution of commercially available aniline (16.24 mmol) [aniline: 1.51 g, 4-methoxyaniline: 2.00 g, 4-chloroaniline: 2.06 g] and  $\text{K}_2\text{CO}_3$  (5.39 g, 38.97 mmol) in DMF (37 mL). The solution was heated to 80 °C and stirred at this temperature overnight. The reaction mixture was then filtered, washed with water (3 x 20 mL) and extracted with EtOAc (2 x 15 mL). The combined organic extracts were washed with brine (30 mL), dried over  $\text{Na}_2\text{SO}_4$  and concentrated in vacuo. The crude product was purified by column chromatography ( $\text{CH}_2\text{Cl}_2$ ) to afford the *N*-allyl aniline as yellowish oil. Next,  $\text{BF}_3 \cdot \text{OEt}_2$  (0.93 mL, 7.36 mmol) was added to a solution of the *N*-allyl aniline (7.36 mmol) in xylene (4 mL). The mixture was heated to 180 °C in a sealed tube and stirred at this temperature for 2 h. After cooling, the reaction mixture was poured into 10% aq NaOH (10 mL), and extracted with EtOAc (3 x 15 mL). The combined organic extracts were washed with brine (10 mL), dried over  $\text{Na}_2\text{SO}_4$ , and concentrated in vacuo. The crude product was purified by column chromatography ( $\text{CH}_2\text{Cl}_2/\text{EtOAc}$ , 4:1) to yield the 2-allyl aniline as colourless oil. The  $^1\text{H}$  and  $^{13}\text{C}$  NMR were in agreement with the reported data.<sup>[6]</sup> The anilines were protected with the tosyl group using the procedure described above.

### ***N*-(2-Allylphenyl)-4-methylbenzenesulfonamide (1a)**

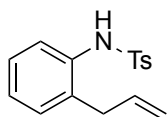

Tosylation yield: 0.45 g (1.56 mmol, 90%). <sup>1</sup>H NMR (CDCl<sub>3</sub>, 400 MHz): δ = 7.51 (d, *J* = 8 Hz, 2H), 7.35 (dd, *J* = 1, 8 Hz, 1H), 7.13-7.18 (m, 3H), 6.96-7.08 (m, 2H), 6.43 (br, 1H), 5.67-5.74 (m, 1H), 5.03 (dd, *J* = 1.5, 10 Hz, 1H), 4.85 (dd, *J* = 2, 11 Hz, 1H), 2.92 (d, *J* = 4Hz, 2H), 2.33 (s, 3H) ppm; Spectral data are in agreement with reported data.<sup>[6]</sup>

### ***tert*-Butyl (2-allylphenyl)carbamate (1b)**

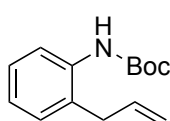

Boc-protection yield: 67%. <sup>1</sup>H NMR (300 MHz, CDCl<sub>3</sub>): δ = 7.79 (d, *J* = 8.7 Hz, 1H), 7.25-7.23 (m, 1H), 7.15 (d, *J* = 7.5 Hz, 1H), 7.05 (t, *J* = 7.2 Hz, 1H), 6.44 (br, 1H), 6.03-5.90 (m, 1H), 5.16 (dd, *J* = 1.5, 9.0 Hz, 1H), 5.07 (dd, *J* = 1.5, 16.8 Hz, 1H), 3.37 (d, *J* = 5.7 Hz, 1H), 1.53 (s, 9H) ppm; Spectral data are in agreement with reported data.<sup>[2]</sup>

### **Benzyl (2-allylphenyl)carbamate (1c)**

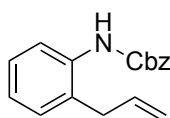

Carboxybenzylation yield: 62%. <sup>1</sup>H NMR (300 MHz, CDCl<sub>3</sub>): δ = 7.82 (d, *J* = 8.0 Hz, 1H), 7.42-7.23 (m, 6H), 7.19 (dd, *J* = 2.0, 7.6 Hz, 1H), 7.09 (td, *J* = 1.2, 7.6 Hz, 1H), 6.61 (br s, 1H), 5.96 (m, 1H), 5.22 (s, 2H), 5.15 (m, 1H), 5.07 (m, 1H), 3.37 (m, 2H) ppm; Spectral data are in agreement with reported data.<sup>[3]</sup>

### ***N*-(2-Allyl-4-chlorophenyl)-4-methylbenzenesulfonamide (3)**

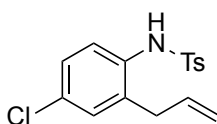

Tosylation Yield: 1.4 g (4.3 mmol, 87%). (Overall yield: 60%). <sup>1</sup>H NMR (CDCl<sub>3</sub>, 400 MHz): δ = 7.61 (d, *J* = 8Hz, 2H), 7.38 (d, 8 Hz, 1H), 7.25 (d, *J* = 8Hz, 2H), 7.21 (dd, *J* = 2, 8 Hz, 1H), 7.10 (d, *J* = 2Hz, 1H), 6.47 (br, 1H), 5.73-5.81 (m, 1H), 5.17 (dd, *J* = 1.6, 12 Hz, 1H), 4.96 (dd, *J* = 1.5, 17 Hz, 1H), 2.98 (d, 6Hz, 2H), 2.45 (s, 3H); Spectral data are in agreement with reported data.<sup>[6]</sup>

### ***N*-(2-Allyl-4-methoxyphenyl)-4-methylbenzenesulfonamide (5)**

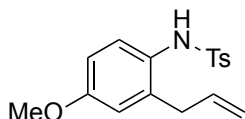

Tosylation Yield: 1.2 g (3.8 mmol, 89%) (Overall yield: 65%). <sup>1</sup>H NMR (CDCl<sub>3</sub>, 400 MHz): δ = 7.58 (d, *J* = 8 Hz, 2H), 7.26 (d, *J* = 8 Hz, 2H), 6.77 (m, 2H), 6.65 (s, 1H), 6.25 (br, 1H), 5.74-5.81 (m, 1H), 5.14 (dd, *J* = 2, 12 Hz, 1H), 4.98 (dd, *J* = 2, 13 Hz, 1H), 3.81 (s, 3H), 2.94 (d, *J* = 5 Hz, 2H), 2.45 (s, 3H) ppm; Spectral data are in agreement with reported data.<sup>[6]</sup>

#### *Procedure for Cyclisation:*

Into an oven-dried round-bottom flask under nitrogen a solution of *N*-(2-allylphenyl)-4-methylbenzenesulfamide **1a** (100 mg, 0.35 mmol) in dry CH<sub>2</sub>Cl<sub>2</sub> (5 mL) was added dropwise to a suspension of [(bistrifluoroacetoxy)iodo]benzene (208 mg, 0.52 mmol) in dry CH<sub>2</sub>Cl<sub>2</sub> (2 mL) at -20 °C. The reaction mixture was stirred for 15 min and treated carefully with suspension of sodium benzenethiolate (46 mg, 0.35 mmol) in dry CH<sub>2</sub>Cl<sub>2</sub> (3 mL). The reaction was stirred for further 15 min and quenched with saturated sodium thiosulfate solution (5 mL), diluted with water (5 mL) and extracted with CH<sub>2</sub>Cl<sub>2</sub> (2 x 10 mL). The organic layers were combined, washed with brine (10 mL) and dried over MgSO<sub>4</sub>, filtered and the solvent was carefully removed under reduced pressure. The crude material was purified by column chromatography on silica gel using ethyl acetate/hexane (20%).

### **2-((Phenylthio)methyl)-1-tosylindoline (2a)**

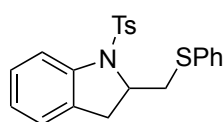

<sup>1</sup>H NMR (400 MHz, CDCl<sub>3</sub>): δ = 7.67 (d, *J* = 8 Hz, 1H), 7.59 (d, *J* = 8 Hz, 2H), 7.25 – 7.15 (m, 6H), 7.09 – 7.00 (m, 4H), 4.40 – 4.31 (m, 1H), 3.70 (dd, *J* = 10, 3 Hz, 1H), 3.30 (t, *J* = 10 Hz, 1H), 2.98 (dd, *J* = 17, 9 Hz, 1H), 2.34 (dd, *J* = 17, 3 Hz, 1H), 2.37 (s, 3H) ppm; <sup>13</sup>C NMR (100 MHz, CDCl<sub>3</sub>): δ = 144.4, 141.3, 136.1, 134.7, 130.5, 129.9, 129.5, 128.9, 128.1, 127.2, 125.4, 125.2, 125.0, 116.9, 62.7, 34.9, 129.4, 21.7 ppm; HRMS (ESI): calc. for C<sub>22</sub>H<sub>22</sub>NO<sub>2</sub>S<sub>2</sub> [M+H]<sup>+</sup>: 396.1014, found: 396.1022.



### Benzyl 2-((phenylthio)methyl)indoline-1-carboxylate (2c)

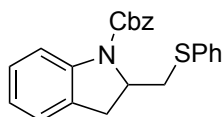

$^1\text{H}$  NMR (400 MHz,  $\text{CDCl}_3$ ):  $\delta$  = 7.86 (br s, 1H), 7.47–7.31 (m, 10H), 7.21 (br s, 1H), 7.17 (d,  $J$  = 7.5 Hz, 1H), 7.00 (t,  $J$  = 7.5 Hz, 1H), 5.32 (s, 2H), 4.93 (br s, 1H), 3.41 (dd,  $J$  = 16.5, 4.5 Hz, 1H), 3.27 (br s, 1H), 2.93 (m, 2H) ppm.

### 5-Chloro-2-((phenylthio)methyl)-1-tosylindoline (4)

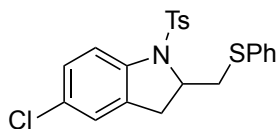

$^1\text{H}$  NMR (400 MHz,  $\text{CDCl}_3$ ):  $\delta$  = 7.59 (dd,  $J$  = 4.8, 8.4 Hz, 1H), 7.44 (d,  $J$  = 7.6 Hz, 2H), 7.39–7.34 (m, 4H), 7.27–7.23 (m, 1H), 7.11 (d,  $J$  = 8.0 Hz, 2H), 6.91 (td,  $J$  = 2.4, 9.2 Hz, 1H), 6.74 (dd,  $J$  = 2.8, 8.0 Hz, 1H), 4.30–4.22 (m, 1H), 3.67 (dd,  $J$  = 3.6, 13.6 Hz, 1H), 2.92–2.73 (m, 3H), 2.34 (s, 3H) ppm;  $^{13}\text{C}$  NMR (100 MHz,  $\text{CDCl}_3$ ):  $\delta$  = 160.4, 144.1, 137.2, 134.7, 134.2, 133.3, 129.6, 129.1, 126.9, 126.3, 118.2, 114.5, 112.4, 61.2, 38.5, 33.2, 21.5 ppm; IR (neat): 3058, 2923, 1599, 1482, 1356, 1166, 1090, 1026, 935, 814  $\text{cm}^{-1}$ ; HRMS (ESI): calc. for  $\text{C}_{22}\text{H}_{21}\text{ClNO}_2\text{S}_2$   $[\text{M}+\text{H}]^+$ : 430.0624, found: 430.0618.

### 5-Methoxy-2-((phenylthio)methyl)-1-tosylindoline (6)

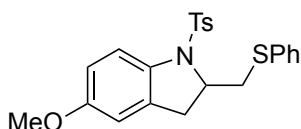

$^1\text{H}$  NMR (400 MHz,  $\text{CDCl}_3$ ):  $\delta$  = 7.53 (dd,  $J$  = 17, 9 Hz, 3H), 7.21–7.27 (m, 5H), 7.17 (d,  $J$  = 8 Hz, 2H), 6.77 (dd,  $J$  = 9, 3 Hz, 1H), 6.60 (d,  $J$  = 3 Hz, 1H), 4.36 – 4.28 (m, 1H), 3.78 (s, 3H), 3.64 (dd,  $J$  = 10, 4 Hz, 1H), 3.26 (t,  $J$  = 10 Hz, 1H), 2.84 – 2.70 (m, 2H), 2.39 (s, 3H) ppm;  $^{13}\text{C}$  NMR (100 MHz,  $\text{CDCl}_3$ ):  $\delta$  = 157.8, 144.3, 135.7, 134.7, 134.4, 132.5, 129.8, 129.6, 128.3, 127.3, 125.7, 118.3, 113.3, 111.0, 63.0, 55.7, 39.2, 35.0, 21.8 ppm; HRMS (ESI): calc. for  $\text{C}_{23}\text{H}_{24}\text{NO}_3\text{S}_2$   $[\text{M}+\text{H}]^+$ : 426.1119, found: 426.1126.

#### Procedure for the synthesis of starting materials **S1** and **S2**

Into an oven-dried round-bottom flask under nitrogen, sodium hydride (60% in oil, 3.52 g, 91.6 mmol) and dimethylformamide (10.3 mL) was added at 0 °C. Diphenylacetoneitrile (2.0 g, 10.35 mmol) [or isobutyronitrile (0.71 g, 10.35 mmol)] was added portionswise over 10 min and stirred

45 min at 0 °C. The resulting suspension was treated dropwise with allylbromide (1.57 mL, 18 mmol), warmed up to room temperature and stirred for 16 h. The resulting solution was cooled to 0 °C and quenched by adding water (20 mL). The mixture was diluted 1:1 with diethyl ether washed with water (3 x 10 mL) and brine (1 x 10 mL). The aqueous layers were extracted with CH<sub>2</sub>Cl<sub>2</sub> (1 x 15 mL). The combined organic layers were dried with MgSO<sub>4</sub> and filtered and concentrated under reduced pressure. The crude material was purified by column chromatography on silica gel using ethyl acetate/hexane (1:5).

### 2,2-Diphenyl-pent-4-enenitrile (S1)

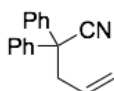

Yield: 3.3 g (14.1 mmol, 70 %); yellow oil.

<sup>1</sup>H NMR (300 MHz, CDCl<sub>3</sub>): δ = 7.15-7.30 (m, 10H), 5.56-5.65 (m, 1H), 5.04-5.14 (m, 2H), 3.02-3.04 (d, *J* = 7 Hz, 2H) ppm; Spectral data are in agreement with literature.<sup>[4]</sup>

### 2,2-Dimethyl-pent-4-enenitrile (S2)

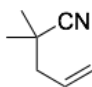

Yield: 1.8 g (16.4 mmol, 62%); colourless oil.

<sup>1</sup>H NMR (300 MHz, CDCl<sub>3</sub>): δ = 5.78-5.95 (m, 1H), 5.25-5.15 (m, 2H), 2.27-2.30 (d, *J* = 7 Hz, 2H), 1.34 (s, 6H) ppm; Spectral data are in agreement with literature.<sup>[4]</sup>

#### *General method of reduction using lithium aluminium hydride*

Into an oven-dried round-bottom flask under nitrogen a solution of compound **S1** (3.3 g, 15 mmol) [or compound **S2** (1.63 g, 15 mmol)] in Et<sub>2</sub>O (100 mL) was added dropwise to a suspension of LiAlH<sub>4</sub> (1.2 g, 32 mmol) in Et<sub>2</sub>O (250 mL) at 0 °C, warmed up to room temperature and stirred for 16 h. The reaction mixture was cooled to 0 °C and treated carefully with 20% aq. NaOH (5 mL), then diluted with Et<sub>2</sub>O (50 mL) and the precipitation salts were filtered. The precipitation was washed with Et<sub>2</sub>O. The organic layers were combined, washed with brine (3 x 10 mL) and dried over MgSO<sub>4</sub>, filtered and the solvent was carefully removed under reduced pressure. The crude material was purified by column chromatography on silica gel using ethyl acetate/hexane (1:5).

### 2,2-Diphenyl-pent-4-enylamine (S3)

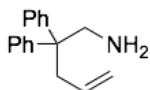

Yield: 2.5 g (10.5 mmol, 75%); colourless oil.

$^1\text{H}$  NMR (300 MHz,  $\text{CDCl}_3$ ):  $\delta$  = 7.08-7.25 (m, 10H), 5.28-5.39 (m, 1H), 4.83-5.02 (m, 2H), 3.25 (m, 2H), 2.84-2.86 (d,  $J$  = 6 Hz, 2H), 1.03 (s, 2H) ppm; Spectral data are in agreement with literature.<sup>[4]</sup>

### 2,2-Dimethyl-pent-4-enylamine (S4)

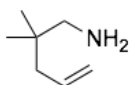

Yield: 0.9 g (7.9 mmol, 53%); yellow oil.

$^1\text{H}$  NMR (400 MHz,  $\text{CDCl}_3$ ):  $\delta$  = 5.71-5.82 (m, 1 H), 4.95-7.99 (m, 2H), 2.38 (s, 2H), 2.03 (m, 2H), 0.87 (s, 6H) ppm; Spectral data are in agreement with literature.<sup>[5]</sup>

### Protection of amines

The amine (6.5 mmol) was dissolved in 20 mL of dry  $\text{CH}_2\text{Cl}_2$ , and treated with tosyl chloride or benzoyl chloride or di-*tert*-butyl dicarbonate (7.1 mmol) and pyridine (1.5 mL, 19.4 mmol). The mixture was stirred at room temperature for 24 h. The solution was diluted with  $\text{H}_2\text{O}$  (10 mL) and extracted with  $\text{Et}_2\text{O}$  (3 x 10 mL). The combined organic layers were washed with brine (10 mL), dried over  $\text{MgSO}_4$  and concentrated in vacuo. The crude material was purified by column chromatography on silica gel using ethyl acetate/hexane (1:9).

### *N*-(2,2-Dimethyl-pent-4-enyl)-4-methyl-benzenesulfonamide (7)

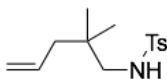

Yield: 0.266 g (0.99 mmol, 23%); colourless solid; m.p.: 73-74 °C.  $^1\text{H}$  NMR (400 MHz,  $\text{CDCl}_3$ ):  $\delta$  = 7.72 (d,  $J$  = 6 Hz, 2H), 7.30 (d,  $J$  = 8 Hz, 2H), 5.70 (m, 1H), 5.02-4.90 (m, 2H), 4.98 (t,  $J$  = 8 Hz, 1H), 2.68 (d,  $J$  = 7 Hz, 2H), 2.40 (s, 3H), 1.99 (d,  $J$  = 7 Hz, 2H), 0.85 (s, 6H) ppm; Spectral data are in agreement with literature.<sup>[6,7]</sup>

#### 4,4-Dimethyl-2-((phenylthio)methyl)-1-tosylpyrrolidine (8)

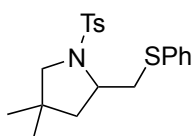

$^1\text{H}$  NMR (400 MHz,  $\text{CDCl}_3$ ):  $\delta = 7.43$  (d,  $J = 8.2$  Hz, 2H), 7.28 (d,  $J = 8.2$  Hz, 2H), 7.08-7.12 (m, 5H), 3.82 (dd,  $J = 13.3, 3.0$  Hz, 1H), 3.55-3.48 (m, 1H), 3.12 (d,  $J = 10.5$  Hz, 1H), 2.93 (d,  $J = 10.4$  Hz, 1H), 2.78 (dd,  $J = 13.3, 10.4$  Hz, 1H), 2.30 (s, 3H), 1.76 (dd,  $J = 12.8, 7.6$  Hz, 1H), 1.53 (dd,  $J = 12.9, 7.8$  Hz, 1H), 0.95 (s, 3H), 0.36 (s, 3H) ppm;  $^{13}\text{C}$  NMR (100 MHz,  $\text{CDCl}_3$ ):  $\delta = 142.4, 135.2, 132.9, 130.6, 129.1, 128.8, 128.5, 126.5, 60.9, 58.1, 44.9, 39.2, 36.2, 25.4, 24.8, 20.5$  ppm.<sup>[8]</sup>

#### *N*-(2,2-Diphenyl-pent-4-enyl)-4-methyl-benzenesulfonamide (9)

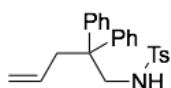

Yield: 2.0 g (5.1 mmol, 61%); colourless solid.  $^1\text{H}$  NMR (400 MHz,  $\text{CDCl}_3$ ):  $\delta = 7.61$  (d,  $J = 9$  Hz, 2H), 7.29-7.29 (m, 8H), 7.07 (d,  $J = 8$  Hz, 4H), 5.21-5.32 (m, 1H), 4.92-4.96 (m, 2H), 3.82 (t,  $J = 8$  Hz, 1H), 3.52 (d,  $J = 6$  Hz, 2H), 2.90 (d,  $J = 7$  Hz, 2H), 2.43 (s, 3H) ppm; Spectral data are in agreement with literature.<sup>[5]</sup>

#### 4,4-Diphenyl-2-((phenylthio)methyl)-1-tosylpyrrolidine (10)

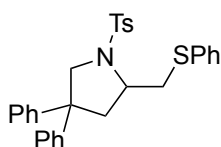

$^1\text{H}$  NMR (400 MHz,  $\text{CDCl}_3$ ):  $\delta = 7.58$ -6.57 (m, 19H), 3.97 (d,  $J = 13.2$  Hz, 1H), 3.27-3.07 (m, 3 H), 3.02 (dd,  $J = 12.3, 8.2$  Hz, 1H), 2.64 (s, 1H), 2.50 (d,  $J = 12.3$  Hz, 1H), 2.31 (s, 1H), 2.16-2.06 (m, 1H), 1.67 (ddd,  $J = 21.7, 10.9, 7.1$  Hz, 2H) ppm;  $^{13}\text{C}$  NMR (100 MHz,  $\text{CDCl}_3$ ):  $\delta = 147.9, 146.9, 138.9, 136.1, 133.6, 130.05, 129.7, 129.6, 128.3, 128.2, 128.1, 127.9, 127.4, 127.2, 125.8, 125.7, 60.2, 59.4, 59.1, 46.4, 36.1, 33.3, 26.9$  ppm; HRMS (ESI): calc. for  $\text{C}_{30}\text{H}_{30}\text{NO}_2\text{S}_2$   $[\text{M} + \text{H}]^+$ : 500.1640, found: 500.1648.

#### 4-Methyl-N-(pent-4-en-1-yl)benzenesulfonamide (11)

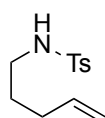

Prepared according to literature.<sup>[9]</sup>

### 2-((Phenylthio)methyl)-1-tosylpyrrolidine (12)<sup>[10]</sup>

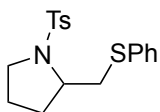

<sup>1</sup>H NMR (400 MHz, CDCl<sub>3</sub>):  $\delta$  = 7.58 (d,  $J$  = 8.0 Hz, 2H), 7.49 (d,  $J$  = 7.5 Hz, 2H), 7.37 (t,  $J$  = 7.5 Hz, 2H), 7.28 – 7.21 (m, 3H), 3.71 (dd,  $J$  = 13, 3 Hz, 1H), 3.65 (ddt,  $J$  = 11, 7.2, 3.1 Hz, 1H), 3.51 (ddd,  $J$  = 10, 6.2, 4.2 Hz, 1H), 3.12 (ddd,  $J$  = 10.0, 8.0, 7 Hz, 1H), 2.79 (dd,  $J$  = 13.5, 11.0 Hz, 1H), 2.42 (s, 3H), 1.94-1.86 (m, 1H), 1.86-1.77 (m, 1H), 1.70-1.60 (m, 1H), 1.58-1.50 (m, 1H) ppm; <sup>13</sup>C NMR (100 MHz, CDCl<sub>3</sub>):  $\delta$  = 143.4, 135.3, 133.7, 129.6, 129.0, 128.9, 127.4, 126.0, 58.8, 49.7, 38.3, 30.2, 23.7, 21.5 ppm.

### 2-(((4-Chlorophenyl)thio)methyl)-1-tosylpyrrolidine (13)<sup>[11]</sup>

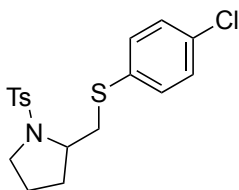

<sup>1</sup>H NMR (400 MHz, CDCl<sub>3</sub>):  $\delta$  = 1.46-1.70 (m, 2H), 1.71-1.94 (m, 2H), 2.41 (s, 3H), 2.77 (dd,  $J$  = 13.4, 10.4 Hz, 1H), 3.03 (m, 1H), 3.57 (m, 2H), 3.64 (m, 1H), 7.26 (d,  $J$  = 8.0 Hz, 2H), 7.32 (d,  $J$  = 8.9 Hz, 2H), 7.40 (d,  $J$  = 8.9 Hz, 2H), 7.55 (d,  $J$  = 8.3 Hz, 2H) ppm; <sup>13</sup>C NMR (100 MHz, CDCl<sub>3</sub>):  $\delta$  = 143.6, 133.9, 133.7, 131.9, 130.2, 129.7, 129.1, 127.4, 58.7, 49.7, 38.5, 30.2, 23.7, 21.5 ppm.

### 1-Methyl-2-(((1-tosylpyrrolidin-2-yl)methyl)thio)-1H-imidazole (14)<sup>[12]</sup>

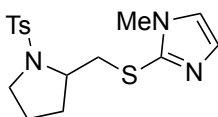

<sup>1</sup>H NMR (400 MHz, [D<sub>6</sub>]-DMSO):  $\delta$  = 1.68-1.77 (m, 1H), 1.83-1.98 (m, 2H), 2.07-2.16 (m, 1H), 3.19-3.22 (m, 2H), 3.35-3.42 (m, 2H), 3.61 (s, 3H), 3.81-3.84 (m, 1H), 7.01 (d,  $J$  = 1.6 Hz, 1H), 7.33 (d,  $J$  = 1.6 Hz, 1H) ppm; <sup>13</sup>C NMR (100 MHz, [D<sub>6</sub>]-DMSO, 25 °C):  $\delta$  = 23.4, 29.2, 33.2, 34.4, 44.6, 59.1, 123.6, 127.9, 139.7 ppm.

*Procedure for asymmetric cyclization:*

Into an oven-dried round-bottom flask under nitrogen a solution of *N*-(2-allylphenyl)-4-methylbenzenesulfamide **1a** (50 mg, 0.17 mmol) in dry CH<sub>2</sub>Cl<sub>2</sub> (2 mL) was added dropwise to a suspension of **18a** (125 mg, 0.21 mmol) in dry CH<sub>2</sub>Cl<sub>2</sub> (2 mL) at -20 °C. The reaction mixture was stirred for 15 min and then treated carefully with suspension of sodium benzenethiolate (25 mg, 0.19 mmol) in dry CH<sub>2</sub>Cl<sub>2</sub> (2 mL). The reaction was stirred for further 15 min and quenched with saturated sodium thiosulfate solution (5 mL), diluted with water (5 mL) and extracted with CH<sub>2</sub>Cl<sub>2</sub> (3 x 5 ml). The organic layers were combined, washed with brine (5 mL) and dried over MgSO<sub>4</sub>, filtered and the solvent was carefully removed under reduced pressure. The crude material was purified by column chromatography on silica gel using ethyl acetate/hexane (20%).

**(*R*)-2-((Phenylthio)methyl)-1-tosylindoline [(*R*)-2a]**

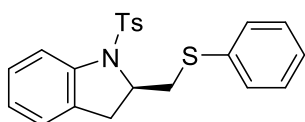

$[\alpha]_D^{20} = 11.5$  ( $c = 0.5$ , CHCl<sub>3</sub>)

HPLC analysis: Daicel Chiralcel AD-H column, hexane/*i*-PrOH = 94/6, 0.8 mL/min, 254 nm;  $t_R$  (*S*) = 18.78 min,  $t_R$  (*R*) = 21.21 min; 79% *ee*.

==== Shimadzu LabSolutions Multi-Chromatogram ====

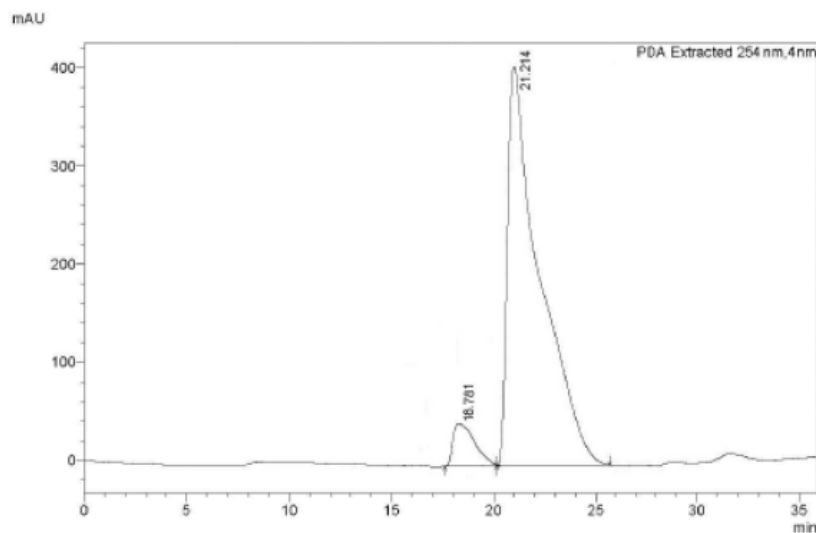

| Peak # | Ret.Time | Area % |
|--------|----------|--------|
| 1      | 18.781   | 10.59  |
| 2      | 21.214   | 89.41  |
|        |          | 78.82  |

**(R)-5-Chloro-2-((phenylthio)methyl)-1-tosylindoline [(R)-4]**

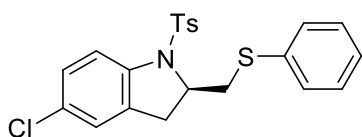

$[\alpha]_D^{20} = 12.2$  ( $c = 0.5$ ,  $\text{CHCl}_3$ )

HPLC analysis: Daicel Chiralcel AD-H column, hexane/*i*-PrOH = 95/5, 0.8 mL/min, 275nm;  $t_R$  (*S*) = 19.91 min,  $t_R$  (*R*) = 22.43 min; 74% *ee* [absolute stereochemistry assigned in comparison to the literature: (*S*)-5-fluoro-2-((phenylthio)methyl)-1-tosylindoline  $[\alpha]_D^{25} = -15.5$  ( $c = 0.57$ ,  $\text{CHCl}_3$ )].<sup>[1]</sup>

==== Shimadzu LabSolutions Multi-Chromatogram ====

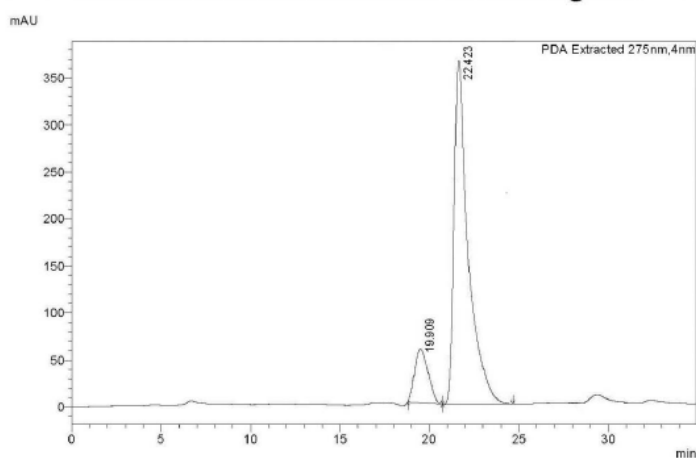

| Peak # | Ret.Time | Area % |
|--------|----------|--------|
| 1      | 19.909   | 13.02  |
| 2      | 22.423   | 86.98  |
|        |          | 73.96  |

**(R)-5-Methoxy-2-((phenylthio)methyl)-1-tosylindoline [(R)-6]**

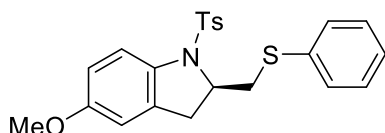

$[\alpha]_D^{20} = 9.3$  ( $c = 0.5$ ,  $\text{CHCl}_3$ )

HPLC analysis: Daicel Chiralcel AD-H column, hexane/*i*-PrOH = 98/2, 1.5 mL/min, 260 nm;  $t_R$  (*S*) = 6.02 min,  $t_R$  (*R*) = 8.14 min; 70% *ee* [absolute stereochemistry assigned in comparison to the literature: (*S*)-5-fluoro-2-((phenylthio)methyl)-1-tosylindoline  $[\alpha]_D^{25} = -15.5$  ( $c = 0.57$ ,  $\text{CHCl}_3$ )].<sup>[1]</sup>

==== Shimadzu LabSolutions Multi-Chromatogram ====

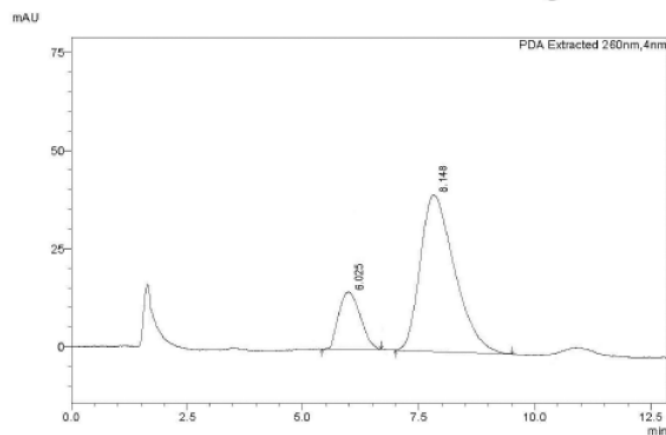

| Peak # | Ret.Time | Area % |
|--------|----------|--------|
| 1      | 6.025    | 15.21  |
| 2      | 8.148    | 84.79  |
|        |          | 69.58  |

**(R)-4,4-Dimethyl-2-((phenylthio)methyl)-1-tosylpyrrolidine [(R)-8]**

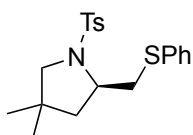

$[\alpha]_D^{20} = 98.7$  ( $c = 0.5$ ,  $\text{CHCl}_3$ )

HPLC analysis: Daicel Chiralcel OD column, hexane/*i*-PrOH = 90/10, 1 mL/min, 220 nm;  $t_R$  (*S*) = 16.32 min,  $t_R$  (*R*) = 18.52 min; 60% *ee* (absolute stereochemistry assigned in analogy to **(R)-12**).

==== Shimadzu LabSolutions Multi-Chromatogram ====

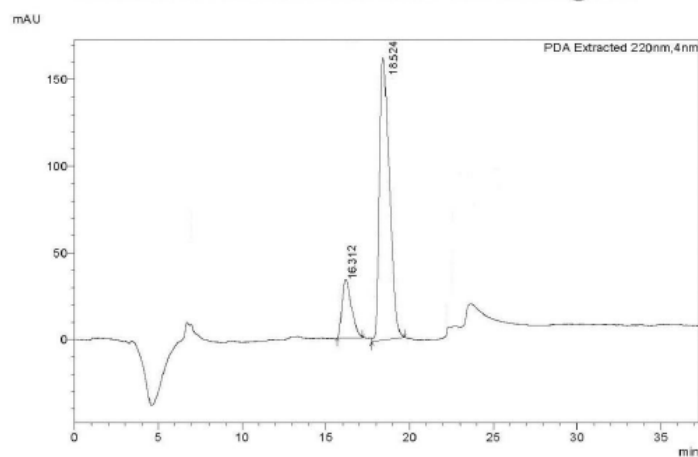

| Peak # | Ret.Time | Area % |
|--------|----------|--------|
| 1      | 16.312   | 19.97  |
| 2      | 18.524   | 80.03  |
|        |          | 60.06  |



**(R)-4,4-Diphenyl-2-((phenylthio)methyl)-1-tosylpyrrolidine [(R)-10]**

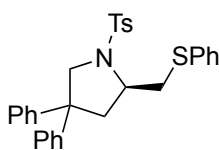

$[\alpha]_D^{20} = 69.8$  ( $c = 0.5$ ,  $\text{CHCl}_3$ )

HPLC analysis: Daicel Chiralcel OD column, hexane/*i*-PrOH = 92/8, 1 mL/min, 220 nm;  $t_R$  (*S*) = 14.58 min,  $t_R$  (*R*) = 17.05 min; 61% *ee* (absolute stereochemistry assigned in analogy to **(R)-12**).

==== Shimadzu LabSolutions Multi-Chromatogram ====

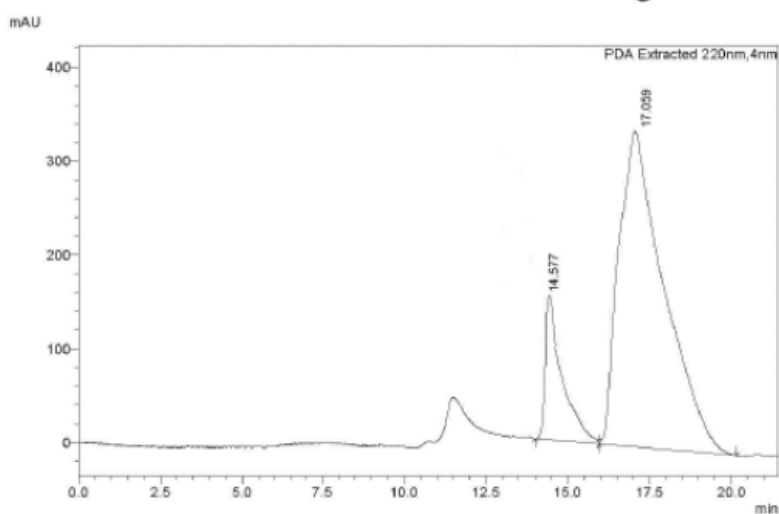

| Peak # | Ret.Time | Area % |
|--------|----------|--------|
| 1      | 14.577   | 19.31  |
| 2      | 17.059   | 80.69  |
|        |          | 61.38  |

**(R)-2-((Phenylthio)methyl)-1-tosylpyrrolidine [(R)-12]**

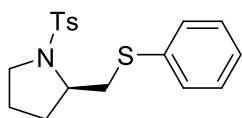

$[\alpha]_D^{20} = 127.3$  ( $c = 1$ ,  $\text{CHCl}_3$ )

[Literature value: (*S*)-((phenylthio)methyl)-1-tosylpyrrolidine (85% *ee*):  $[\alpha]_D^{24} = -228.7^\circ$  ( $c = 1$ ,  $\text{CHCl}_3$ )]<sup>[10]</sup>

HPLC analysis: Daicel Chiralcel OD-H column, hexane/*i*-PrOH = 95/5, 0.8 mL/min, 220 nm;  $t_R$  (*S*) = 13.11 min,  $t_R$  (*R*) = 15.21 min; 55% *ee*.

==== Shimadzu LabSolutions Multi-Chromatogram ====

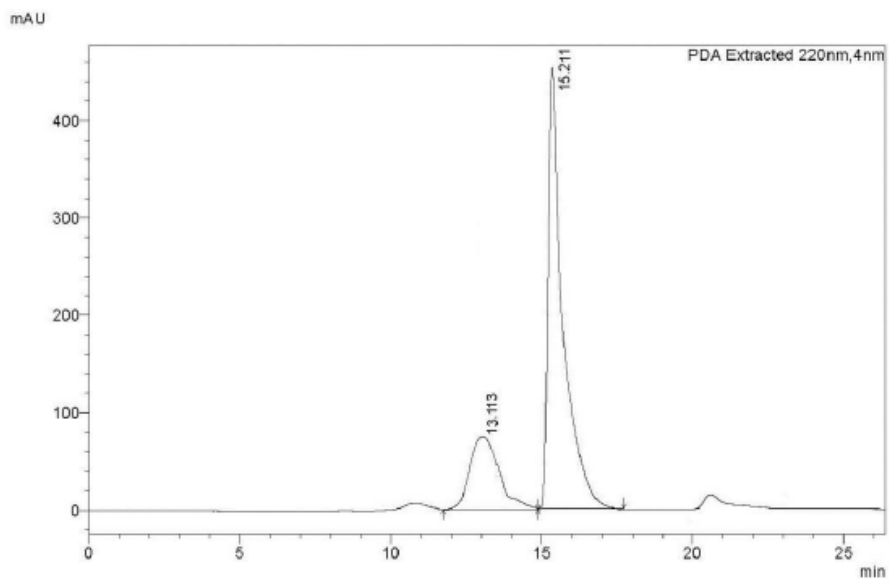

| Peak # | Ret.Time | Area % |
|--------|----------|--------|
| 1      | 13.113   | 22.69  |
| 2      | 15.211   | 77.31  |
|        |          | 54.62  |

**(R)-1-Methyl-2-(((1-tosylpyrrolidin-2-yl)methyl)thio)-1H-imidazole [(R)-14]**

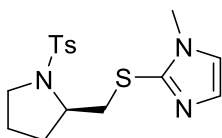

$[\alpha]_D^{20} = 32.1$  (c = 1, CHCl<sub>3</sub>)

HPLC analysis: Daicel Chiralpak OD-H, hexane/*i*PrOH = 95:5, flow rate 1.0 mL/min, 254 nm:  $t_R$  (S) = 15.81,  $t_R$  (R) 20.05 min; 25% *ee* (absolute stereochemistry assigned in analogy to (R)-12).

==== Shimadzu LabSolutions Multi-Chromatogram ====

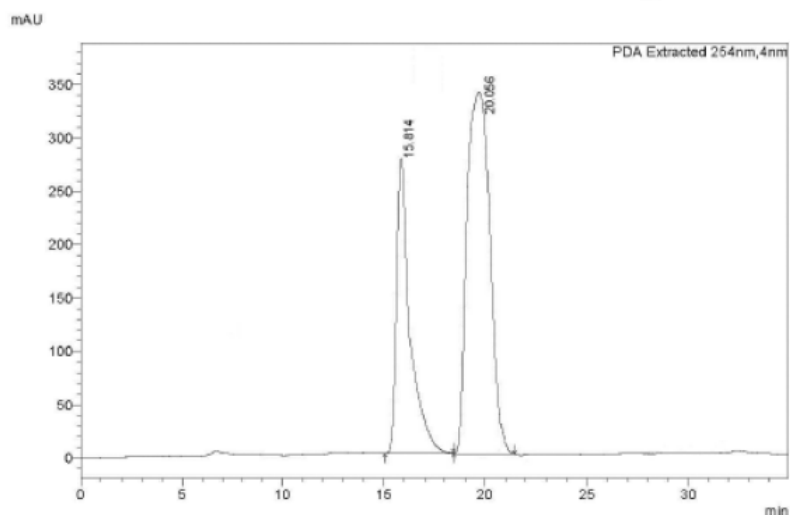

| Peak # | Ret. Time | Area % |
|--------|-----------|--------|
| 1      | 15.814    | 37.57  |
| 2      | 20.056    | 62.43  |
|        |           | 24.86  |

- 
- [1] M. T. Bovino, S. R. Chemler, *Angew. Chem. Int. Ed.* **2012**, *51*, 3923-3927.
- [2] F. E. Michael, B. M. Cochran, *J. Am. Chem. Soc.* **2006**, *128*, 4246-4247.
- [3] X. Han, R. A. Widenhoefer, *Angew. Chem. Int. Ed.* **2006**, *45*, 1747-1749.
- [4] P. H. Martínez, K. C. Hultsch, F. Hampel, *Chem. Commun.* **2006**, 2221-2223.
- [5] P. H. Fuller, J. W. Kim, S. R. Chemler, *J. Am. Chem. Soc.* **2009**, *130*, 17638-17639.
- [6] C. F. Bender, R. A. Widenhoefer, *J. Am. Chem. Soc.* **2005**, *127*, 1070-1071.
- [7] W. Zeng, S. R. Chemler, *J. Am. Chem. Soc.* **2007**, *129*, 12948-12949.
- [8] G. Liu, Y. Li, *J. Org. Chem.* **2014**, *79*, 10094-10109.
- [9] G.-Q. Liu, Z.-Y. Ding, L. Zhang, T.-T. Li, L. Li, L. Duan, Y.-M. Li, *Adv. Synth. Catal.* **2014**, *356*, 2303-2310.
- [10] S. E. Denmark, H. M. Chi, *J. Am. Chem. Soc.* **2014**, *136*, 8915-8918.
- [11] V. Hugenberg, R. Fröhlich, G. Haufe, *Org. Biomol. Chem.*, **2010**, *8*, 5682-5691.
- [12] D. Xu, L. Wang, S. Luo, Y. Wang, S. Zhang, Z. Xu, *Eur. J. Org. Chem.* **2008**, 1049-1053.

NMR spectra

2-((Phenylthio)methyl)-1-tosylindoline (2a)

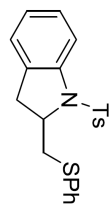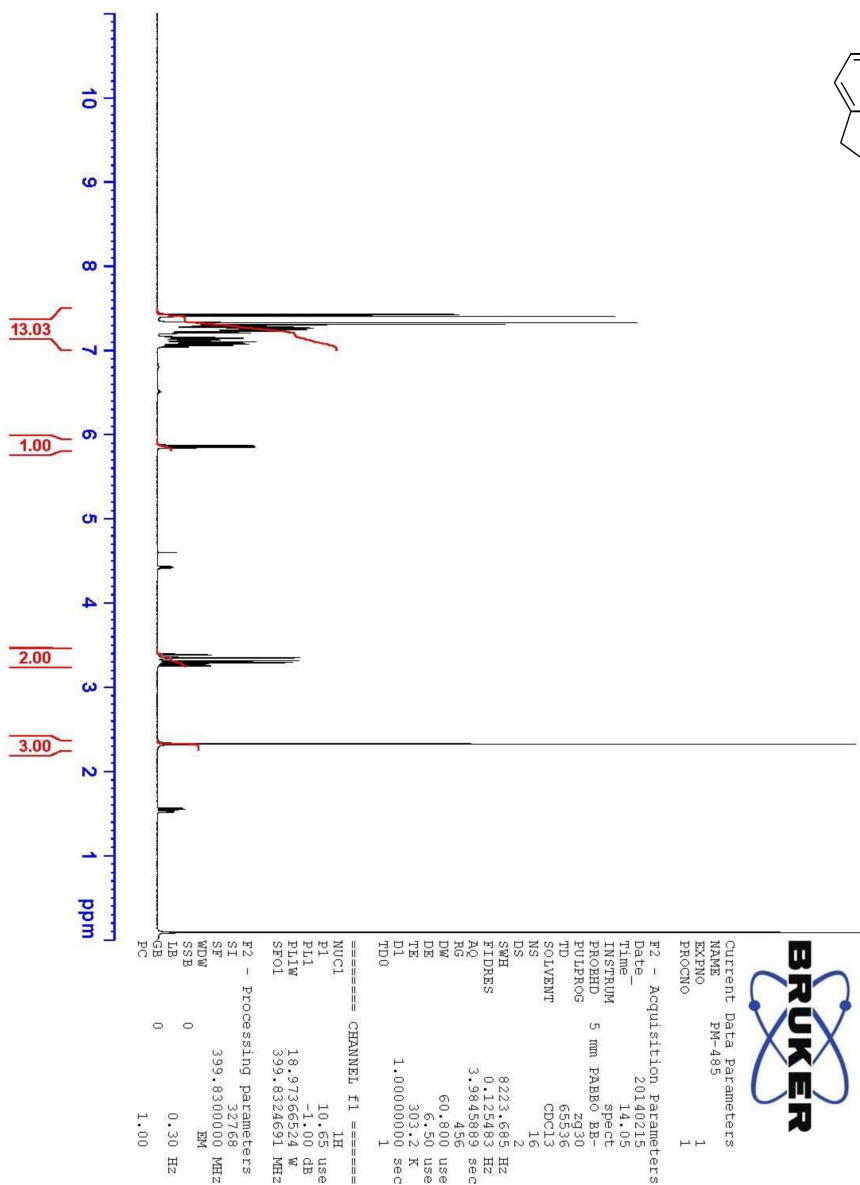

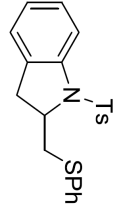

0.25  
0.22  
0.19  
0.16  
0.13  
0.10  
0.07  
0.04  
0.01

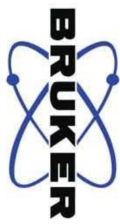

Current Data Parameters  
NAME: PM-662  
EXPNO: 11  
PROCNO: 11

F2 - Acquisition Parameters

Date\_ 20140327  
Time 12:02  
INSTRUM spect  
PROBHD 5 mm PABBO BB/  
PULPROG zgpg30  
TD 65536  
SOLVENT CDCl3  
NS 1024  
DS 4  
SWH 24038.461 Hz  
FIDRES 0.366798 Hz  
AQ 1.361488 sec  
RG 199.98  
RQ 20.630  
DE 6.50  
TE 303.2 K  
D1 2.00000000 sec  
D11 0.03000000 sec  
T00 1

==== CHANNEL f1 =====  
SFO1 100.6228293 MHz  
NUC1 13C  
P1 9.75 usec  
E1 75.00000000 W  
EM1

==== CHANNEL f2 =====  
SFO2 400.1316005 MHz  
NUC2 1H  
P2 30.00 usec  
E2 21.00000000 W  
EM2 0.22000000 W  
EM13 0.17010000 W

F2 - Processing parameters  
SI 32768  
SF 100.617678 MHz  
WDW EM  
SSB 0  
LB 1.00 Hz  
GB 0  
FC 1.40

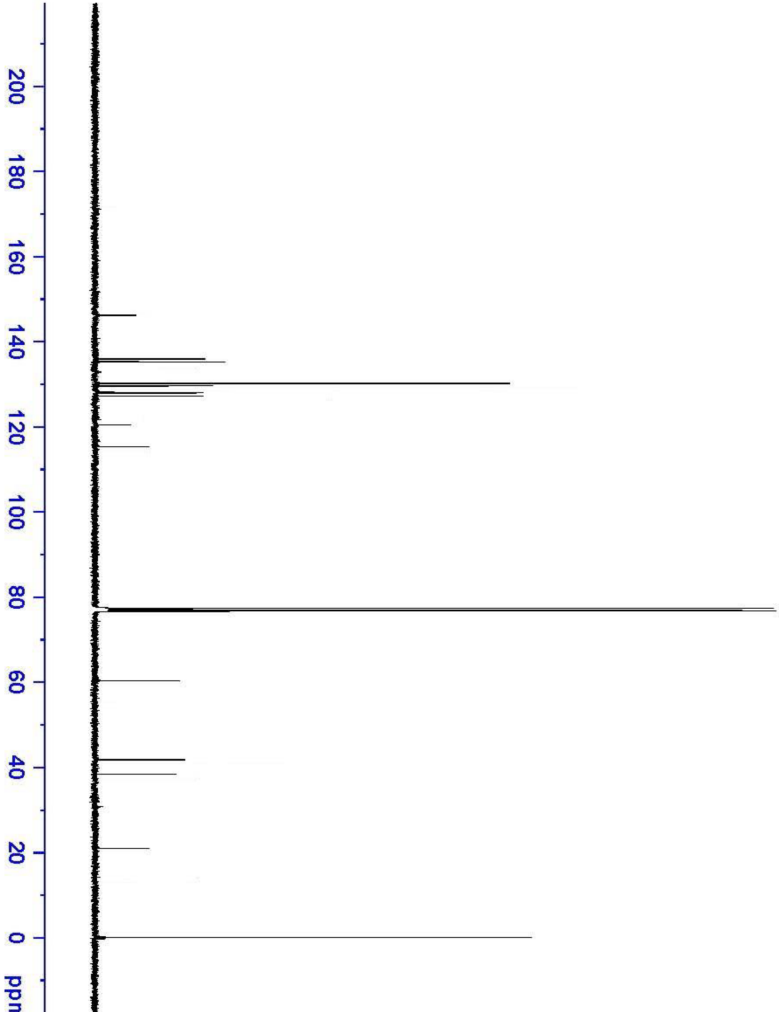

# 5-Chloro-2-((phenylthio)methyl)-1-tosylindoline (4)

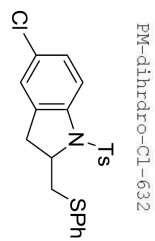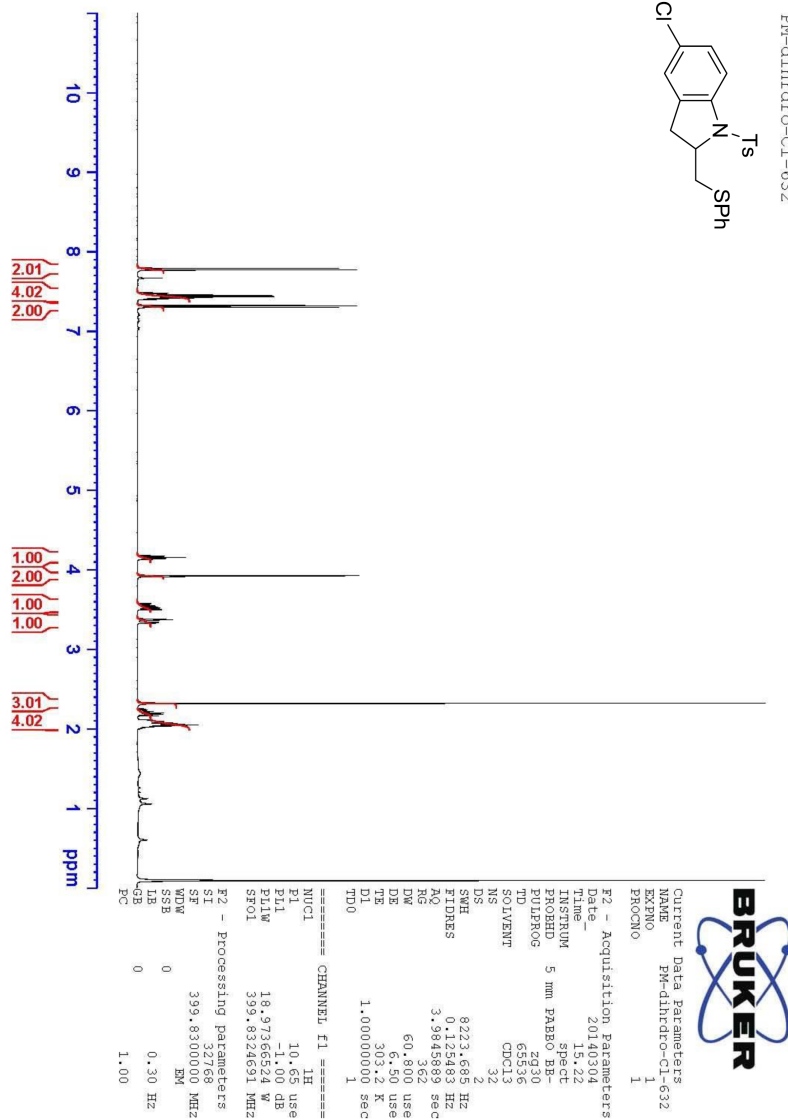

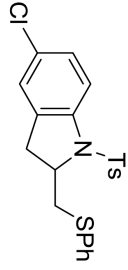

77.33  
77.23  
77.02  
76.70

63.8  
63.4  
63.0  
62.6

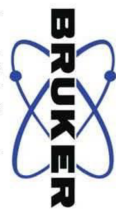

Current Data Parameters

NAME PR-615

EXPERNO 11

PROCNO 1

F2 - Acquisition Parameters

Date\_ 20140228

Time 10.43

INSTRUM spect

PROBHD 5 mm PABBO

PULPROG zgpg30

TD 65536

SOLVENT CCl4

DS 1024

SWH 24038.461 Hz

FIDRES 0.366798 Hz

AQ 1.332488 sec

DM 20.800 usec

DE 6.50 usec

TE 303.1 K

D1 2.000000 sec

D11 0.300000 sec

TD 1

```

===== CHANNEL f1 =====
NUC1 13C
P1 9.75 usec
PR1 75.00000000 W
===== CHANNEL f2 =====
NUC2 1H
P2 1.40 usec
PR2 400.1316005 MHz
===== CHANNEL f3 =====
CEPRGRF2 waltz16
CPDPR2 21.00000000 usec
P3 1.00 usec
PR3 100.6127665 MHz
P4 1.00 usec
PR4 0.22000000 W
P5 1.00 usec
PR5 0.17010000 W
===== Processing parameters =====
SI 32768
SF 100.6127665 MHz
WDW EM
SSB 0
GB 0
EC 1.40
  
```

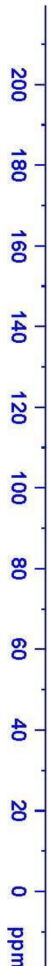

# 5-Methoxy-2-((phenylthio)methyl)-1-tosylindoline (6)

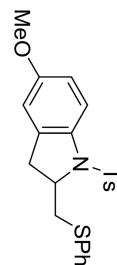

PM-458-Ome

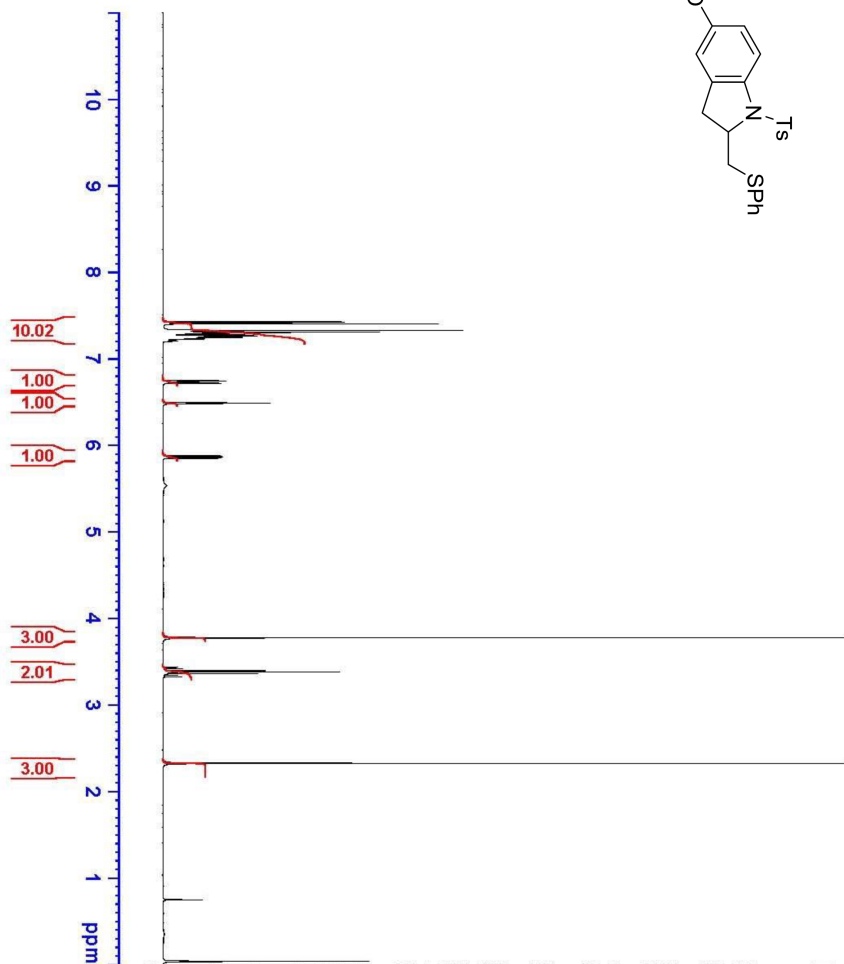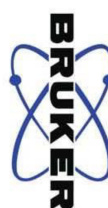

Current Data Parameters  
 NAME PM-458-Ome  
 EXPTNO 1  
 PROCNO 1

F2 - Acquisition Parameters

Date\_ 20160302  
 Time 20:31  
 INSTRUM spect  
 PROBRD 5 mm PABBO BB-  
 PULPROG zgpg30  
 TD 65536  
 SOLVENT CDCl3  
 NS 16  
 DS 2  
 SWH 8223.685 Hz  
 FIDRES 0.125483 Hz  
 AQ 3.9845889 sec  
 RG 256  
 DW 60.800 use  
 DE 6.50 use  
 TE 303.2 K  
 D1 1.00000000 sec  
 TD0 1

==== CHANNEL F1 =====

NUC1 1H  
 P1 10.65 use  
 PL1 -1.00 dB  
 PL1W 18.97366524 W  
 SFO1 399.8324691 MHz  
 F2 - Processing parameters  
 SI 32768  
 SF 399.8300000 MHz  
 WDW EM  
 SSB 0  
 LB 0.30 Hz  
 GB 0  
 PC 1.00



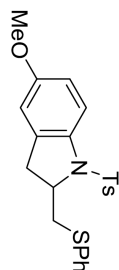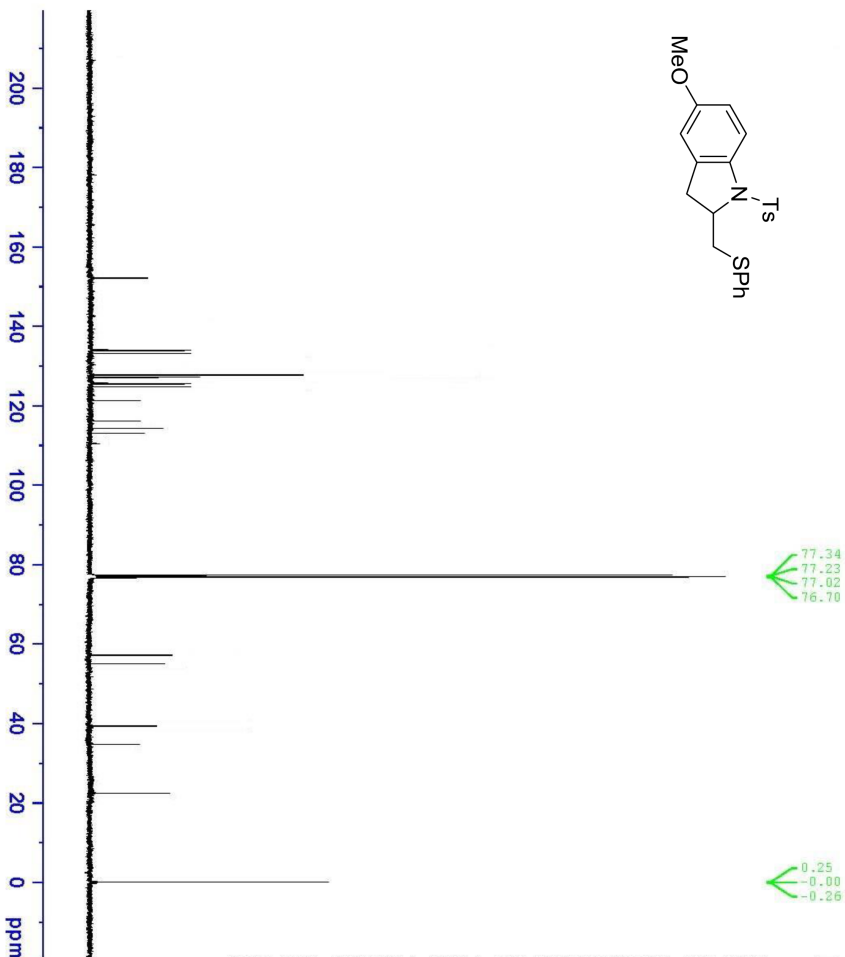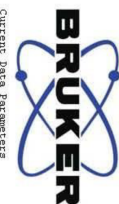

Current Data Parameters  
 NAME ZR-616  
 EXPNO 11  
 F2 - Acquisition Parameters  
 Time 20.19 0.01  
 INSTRUM spect  
 PULPROG zgpg30  
 TP 64536  
 SOLVENT CDCl3  
 DS 4  
 SFR 24038.461 Hz  
 AQ 1.361488 sec  
 RG 199.980 usec  
 DE 6.50 usec  
 TE 303.1 K  
 D1 0.03000000 sec  
 TPO 1

===== CHANNEL f1 =====  
 SFO1 100.628293 MHz  
 NUC1 13C  
 P1 9.00 usec  
 PL1 75.00000000 W

===== CHANNEL f2 =====  
 SFO2 400.1316005 MHz  
 NUC2 1H  
 P2 12.00 usec  
 PCPD2 21.00000000 W  
 PL2 0.42000000 W  
 PL12 0.12000000 W

F2 - Processing Parameters  
 SF 100.617664 MHz  
 WDW EM  
 LB 1.00 Hz  
 GB 0  
 PC 1.40

# 4,4-Dimethyl-2-((phenylthio)methyl)-1-tosylpyrrolidine (8)

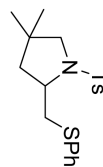

PM-dimethyl-665

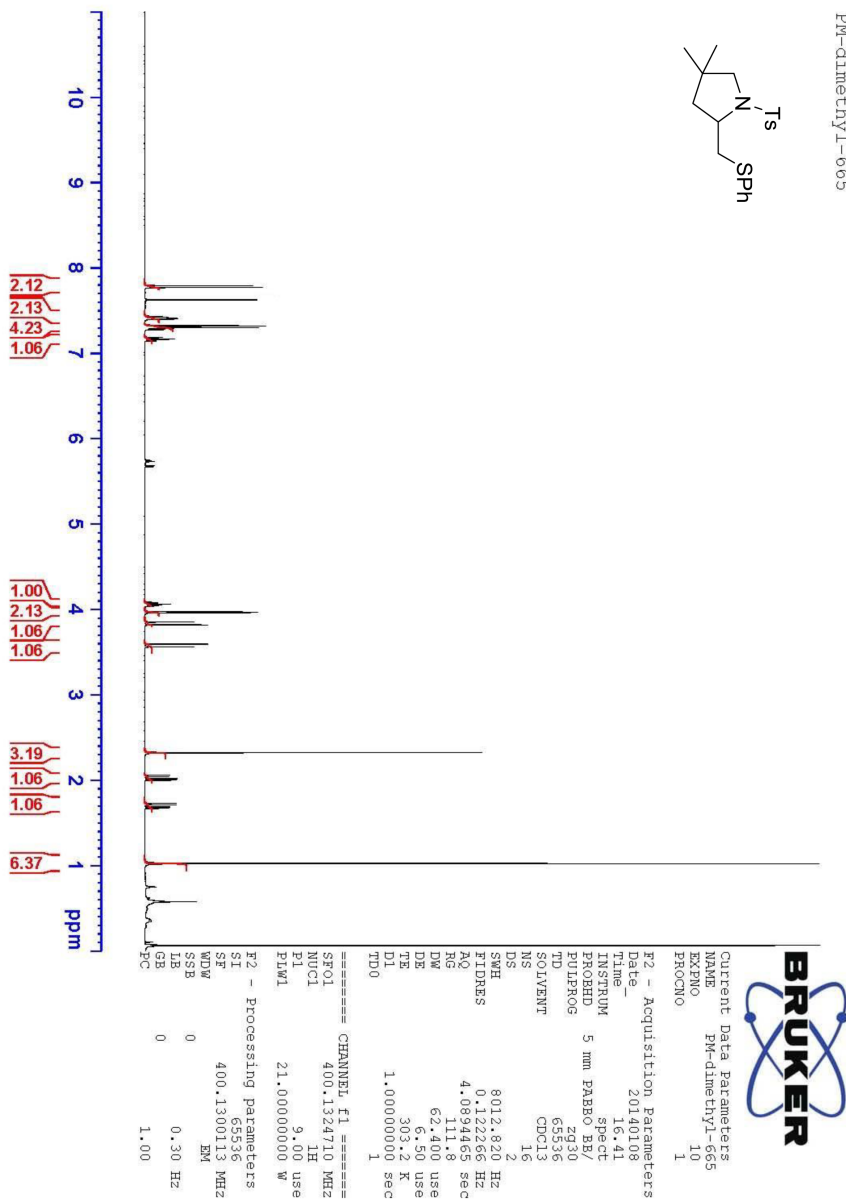

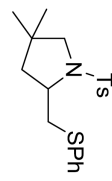

77.33  
77.22  
77.02  
76.70

0.00  
0.25

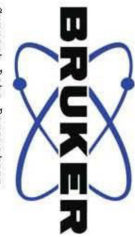

Current Data Parameters  
Date\_ 20191219  
Time\_ 12:14  
EXPNO 11  
PROCNO 1

F2 - Acquisition Parameters  
Date\_ 20191219  
Time\_ 12:14  
INSTRUM spect  
PROBHD 5 mm PABO BB/  
PULPROG zgpg30  
TD 65536  
SFO1 102.4  
SFO2 102.4  
SFO3 102.4  
SFO4 102.4  
SFO5 102.4  
SFO6 102.4  
SFO7 102.4  
SFO8 102.4  
SFO9 102.4  
SFO10 102.4  
SFO11 102.4  
SFO12 102.4  
SFO13 102.4  
SFO14 102.4  
SFO15 102.4  
SFO16 102.4  
SFO17 102.4  
SFO18 102.4  
SFO19 102.4  
SFO20 102.4  
SFO21 102.4  
SFO22 102.4  
SFO23 102.4  
SFO24 102.4  
SFO25 102.4  
SFO26 102.4  
SFO27 102.4  
SFO28 102.4  
SFO29 102.4  
SFO30 102.4  
SFO31 102.4  
SFO32 102.4  
SFO33 102.4  
SFO34 102.4  
SFO35 102.4  
SFO36 102.4  
SFO37 102.4  
SFO38 102.4  
SFO39 102.4  
SFO40 102.4  
SFO41 102.4  
SFO42 102.4  
SFO43 102.4  
SFO44 102.4  
SFO45 102.4  
SFO46 102.4  
SFO47 102.4  
SFO48 102.4  
SFO49 102.4  
SFO50 102.4  
SFO51 102.4  
SFO52 102.4  
SFO53 102.4  
SFO54 102.4  
SFO55 102.4  
SFO56 102.4  
SFO57 102.4  
SFO58 102.4  
SFO59 102.4  
SFO60 102.4  
SFO61 102.4  
SFO62 102.4  
SFO63 102.4  
SFO64 102.4  
SFO65 102.4  
SFO66 102.4  
SFO67 102.4  
SFO68 102.4  
SFO69 102.4  
SFO70 102.4  
SFO71 102.4  
SFO72 102.4  
SFO73 102.4  
SFO74 102.4  
SFO75 102.4  
SFO76 102.4  
SFO77 102.4  
SFO78 102.4  
SFO79 102.4  
SFO80 102.4  
SFO81 102.4  
SFO82 102.4  
SFO83 102.4  
SFO84 102.4  
SFO85 102.4  
SFO86 102.4  
SFO87 102.4  
SFO88 102.4  
SFO89 102.4  
SFO90 102.4  
SFO91 102.4  
SFO92 102.4  
SFO93 102.4  
SFO94 102.4  
SFO95 102.4  
SFO96 102.4  
SFO97 102.4  
SFO98 102.4  
SFO99 102.4  
SFO100 102.4

==== CHANNEL f1 =====  
SFO1 100.628293 MHz  
NUC1 13C  
P1 13C  
PCPD2 9.13C  
PLM1 75.00000000 W  
===== CHANNEL f2 =====  
SFO2 400.1316005 MHz  
NUC2 1H  
P1 1H  
PCPD2 90.00 usec  
PLM2 21.00000000 W  
PLM12 0.22000000 W  
PLM13 0.17010000 W  
F2 - Processing parameters  
SI 32768  
SF 100.6127667 MHz  
MDM 0  
SSB 0  
GB 0  
PC 1.40

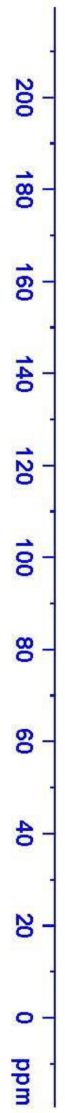

# 4,4-Diphenyl-2-((phenylthio)methyl)-1-tosylpyrrolidine (10)

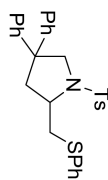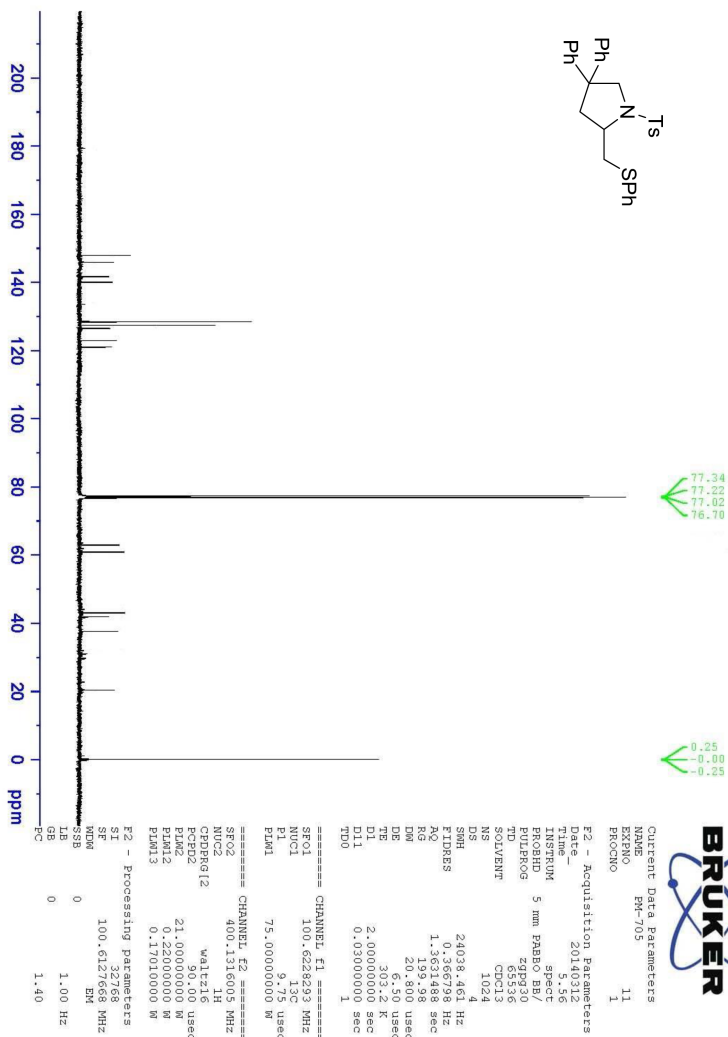

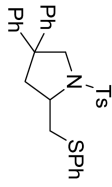

77.34  
77.22  
77.02  
76.70

0.25  
-0.00  
-0.25

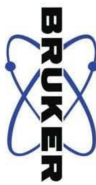

Current Data Parameters  
NAME: F2  
EXPNO: 11  
PROCNO: 1

F2 - Acquisition Parameters

Date\_ 20140312  
Time 14:42  
INSTRUM spect  
PROBHD 5 mm PABBO BB/  
PULPROG zgpg30  
TD 65536  
SOLVENT CDCl3  
NS 1024  
DS 4  
SWH 24038.461 Hz  
FIDRES 0.366798 Hz  
AQ 1.3631488 sec  
RG 199.98  
RQ 20.830  
DM 20.850  
TE 303.2 K  
D1 2.00000000 sec  
D11 0.03000000 sec  
TD0 1

==== CHANNEL f1 =====  
SFO1 100.6228293 MHz  
NUC1 13C  
P1 9.75 usec  
PL1 75.00000000 W

==== CHANNEL f2 =====  
SFO2 400.1316005 MHz  
NUC2 1H  
P2 1H  
PL2 400.00000000 W

F2 - Processing parameters  
SI 32768  
SF 100.6127684 MHz  
RG 655  
WDW EM  
SSB 0 1.00 Hz  
GB 0 1.40

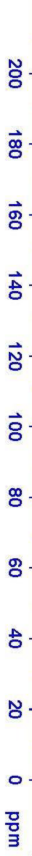

# 2-((Phenylthio)methyl)-1-tosylpyrrolidine (12)

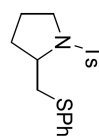

PM-dihydro-614

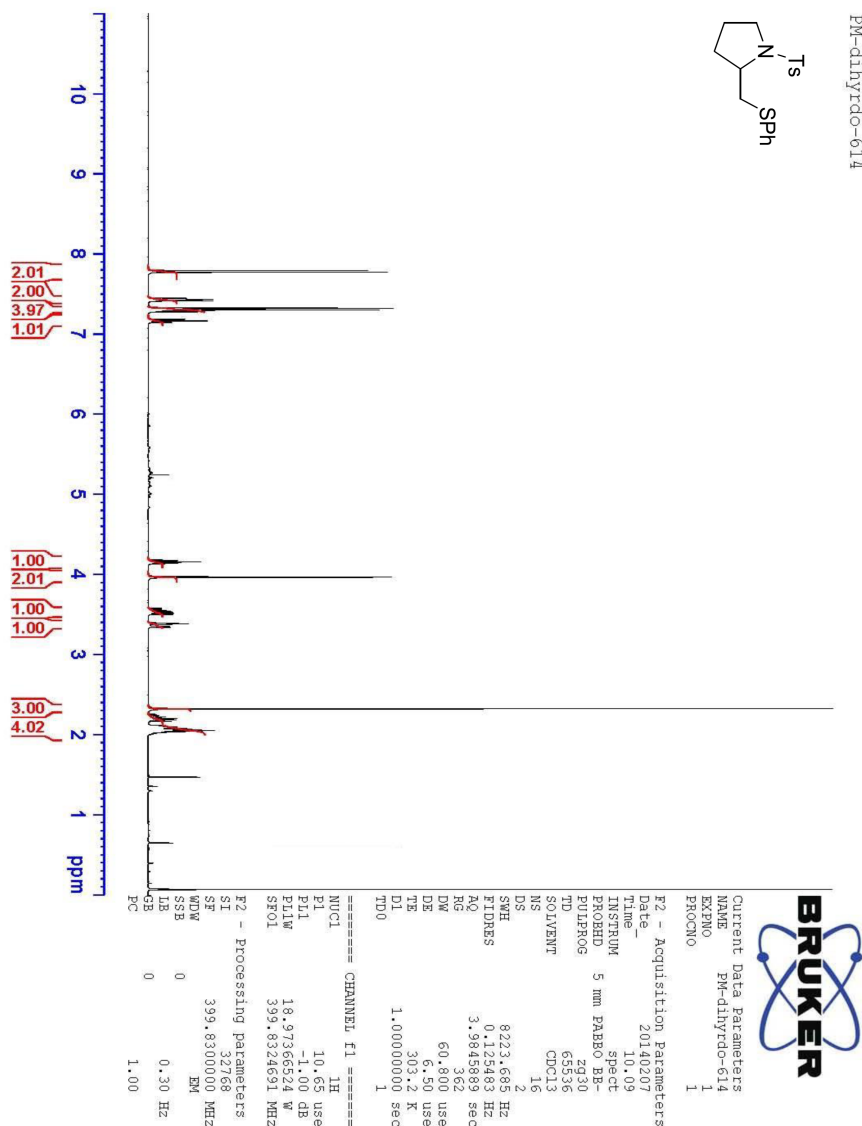

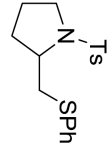

77.34  
77.22  
77.02  
76.70

0.00

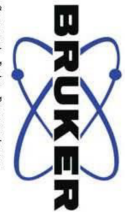

Current Data Parameters  
 EXNO 11  
 PROCNO 1

F2 - Acquisition Parameters  
 Date\_ 20140309  
 Time 22:40

PROBHD 5 mm BBO  
 PULPROG zgpg30  
 TD 65536  
 SFO2 400.1316005 MHz  
 NS 1024  
 DS 4  
 SFO1 100.628392 MHz  
 AQ 1.361488 sec  
 PG 199.98  
 DM 20.800 usec  
 TE 303.1 K  
 D1 2.0000000 sec  
 D11 0.0900000 sec  
 D12 1

===== CHANNEL f1 =====  
 SFO1 100.628392 MHz  
 P1 9.75 usec  
 P1M1 75.00000000 W

===== CHANNEL f2 =====  
 SFO2 400.1316005 MHz  
 P2 1H  
 P2M1 1H  
 P2M2 21.00000000 W  
 P2M12 0.22000000 W  
 P2M13 0.170100000 W

F2 - Processing parameters  
 SI 32768  
 MD 100.617688 MHz  
 SSB 0  
 GB 1.00 Hz  
 PC 1.40

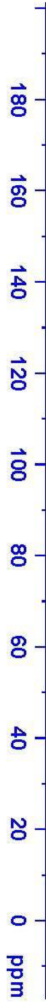

# 1-Methyl-2-(((1-tosylpyrrolidin-2-yl)methyl)thio)-1H-imidazole (14)

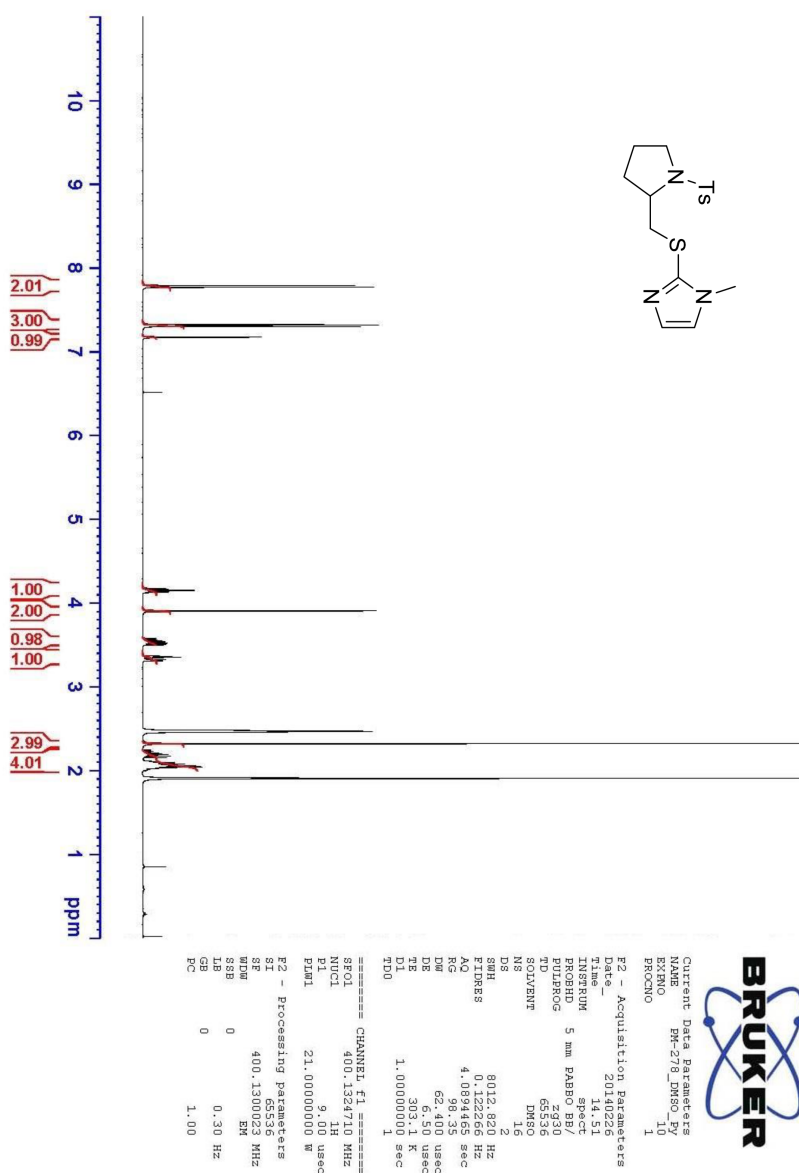



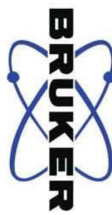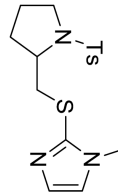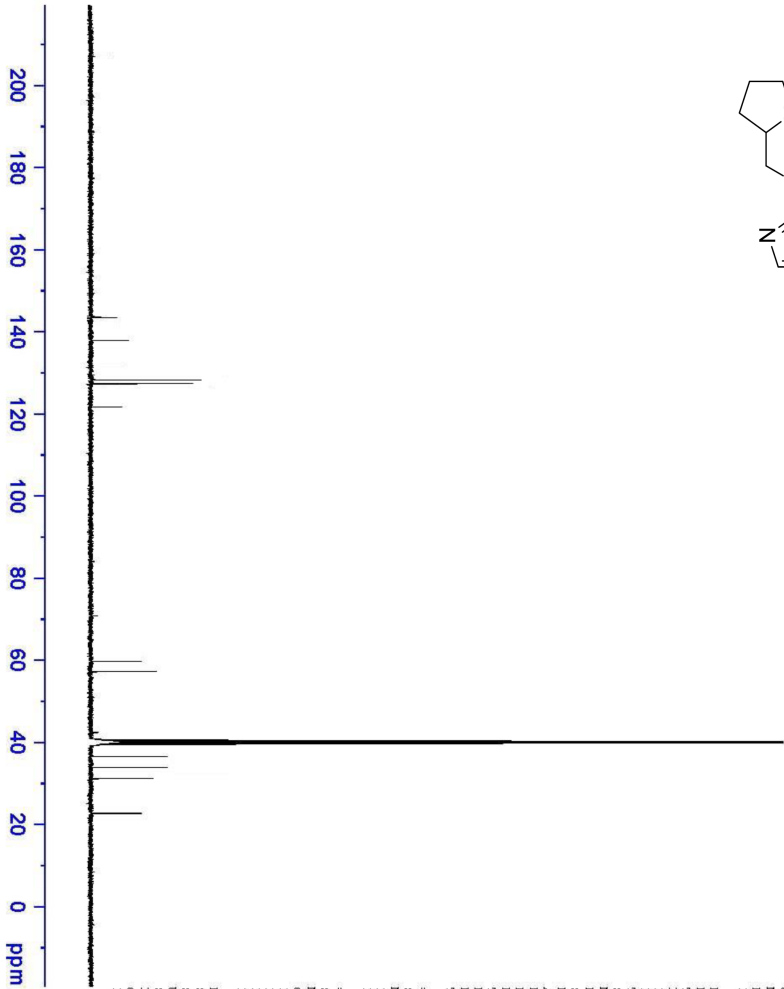

Current Data Parameters  
NAME EM-278\_DMSO-11  
EXPNO 11  
PROCNO 1

F2 - Acquisition Parameters  
Date\_ 20140306  
Time 19.37  
INSTRUM spect  
PROBHD 5 mm PABBO BB/  
PULPROG zgpg30  
SOLVENT DMSO  
NS 1024  
DS 4

SWH 24038.461 Hz  
FIDRES 0.366798 Hz  
AQ 1.3631488 sec  
RG 199.98  
RF 20.860 usec  
DE 4.50 usec  
TE 303.1 K  
D1 2.00000000 sec  
D11 0.03000000 sec  
TD0 1

=====  
CHANNEL f1  
NUC1 100.6228233 MHz  
P1 9.75 usec  
PLW1 75.00000000 W

=====  
CHANNEL f2  
SF02 400.1316005 MHz  
NUC2 1H  
P2 16.00 usec  
PLW2 21.00000000 W

F2 - Processing parameters  
SI 32768  
RG 100.6127685 MHz  
BN 888  
IB 0 1.00 Hz  
GB 0  
PC 1.40
